# Supplementary material for: Circulating metabolites associated with protection against Mycobacterium tuberculosis infection and inhibition of mycobacterial growth
Source: Research Square preprint supplement (doi:10.21203/rs.3.rs-6882340/v1), 2025-10-31
Supplement: Supplementary file 1 [file 0b56ee0d9202fd3bb6cd94c3.pdf]

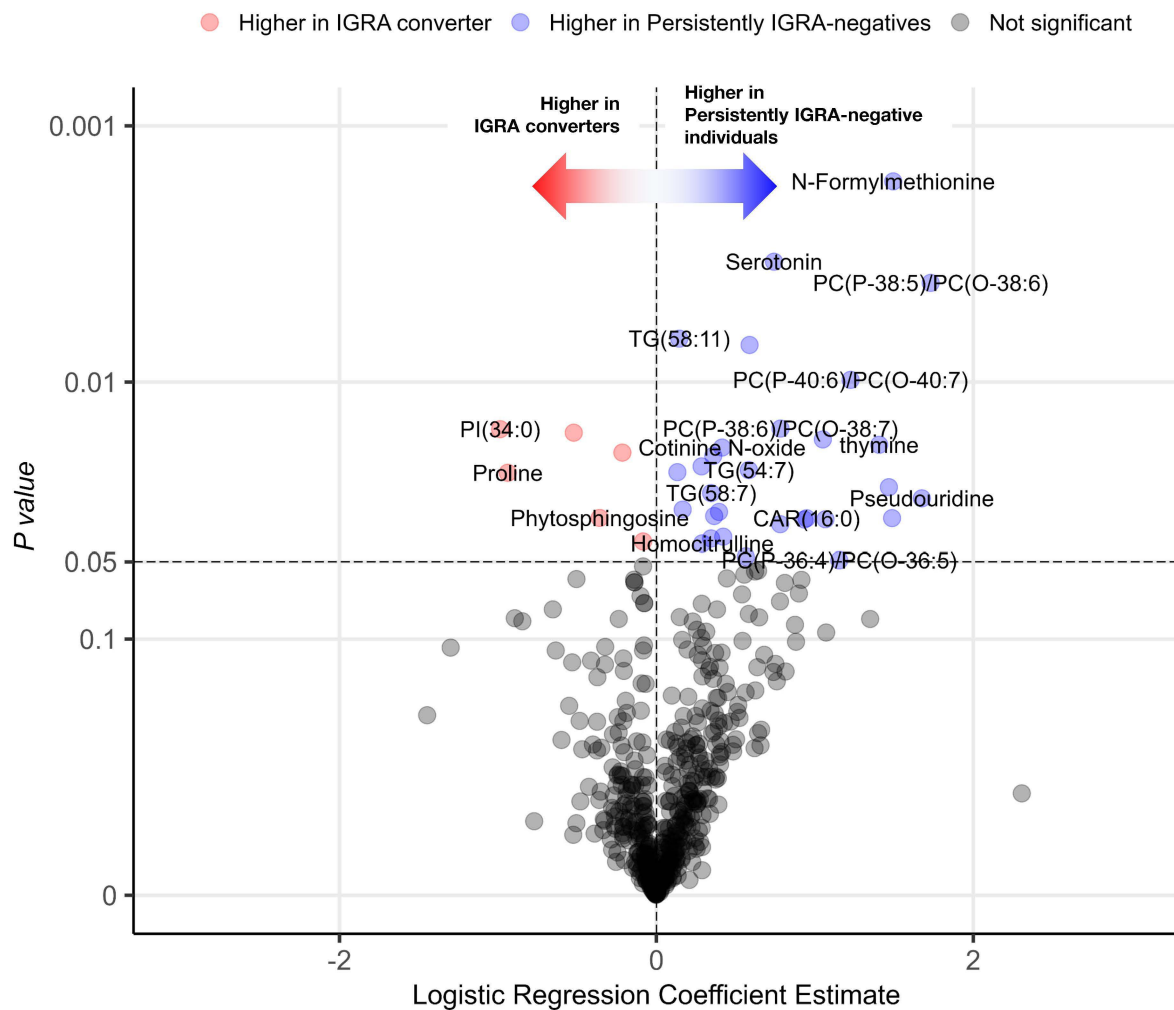

**Supplementary Figure 1. Association of circulating metabolite levels with IGRA status at week 14 using all TB household contact with available metabolite data**

Logistic regression was used to identify metabolites which associated IGRA status at follow-up, adjusting for age, sex, BMI, presence of BCG scar, and exposure risk score in household contacts (N=199). Using all TB household contacts, we found 34 differentially abundant metabolites between IGRA converters and persistently IGRA-negative individuals.

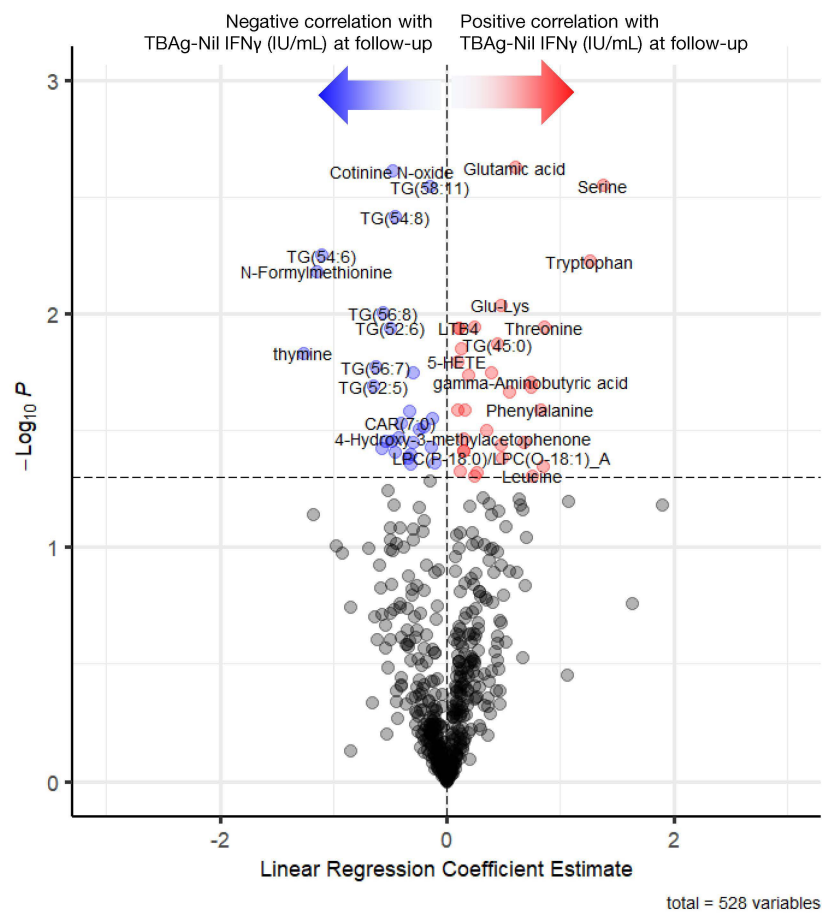

**Supplementary Figure 2. Correlation of circulating metabolite levels with quantitative IFN $\gamma$  in follow-up IGRA (week 14)**

Linear regression was used to identify baseline metabolites which level predicted quantitative IGRA IFN $\gamma$  level (TBAg-Nil; IU/ml) of IGRA test at follow-up, adjusting for age, sex, BMI, presence of BCG scar, and exposure risk score in household contacts, and using strict IGRA cut-offs.
